# Supplementary material
Source: Research Square preprint supplement (doi:10.21203/rs.3.rs-10206443/v1)

**(a) Richardson-number regimes within the MLD to MLD + 80 m layer,**

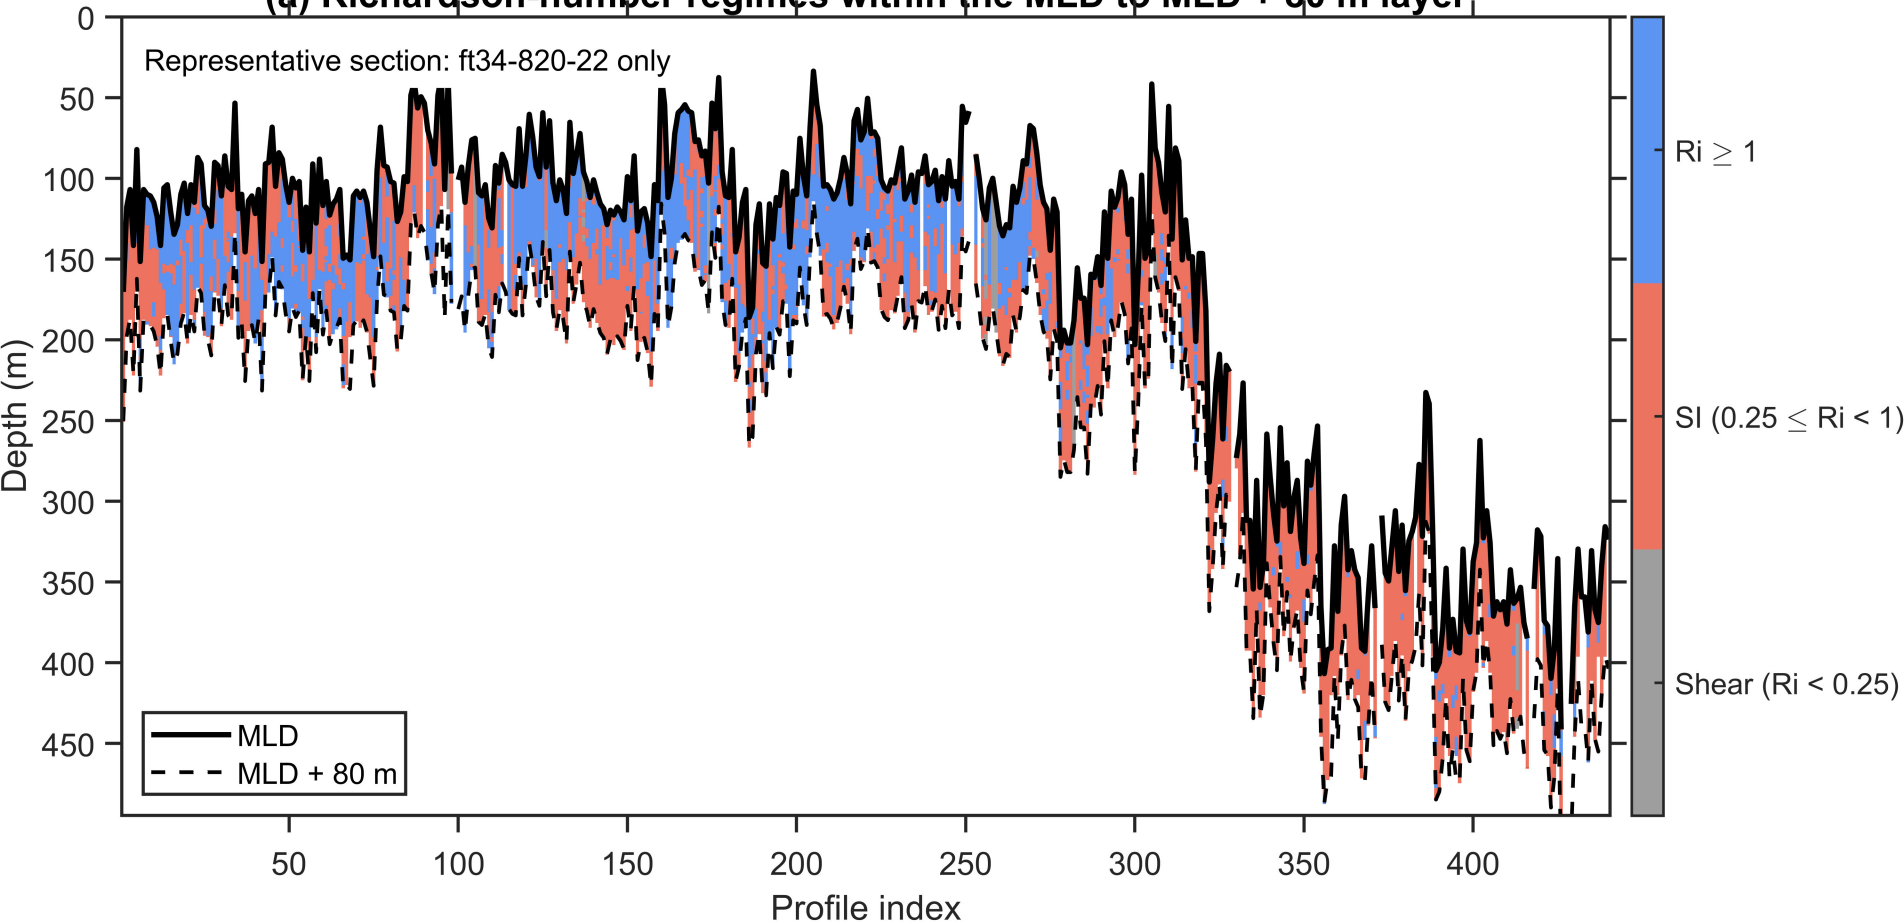

**(b) Instability regimes in the top 10%  $|w|$  active cells**

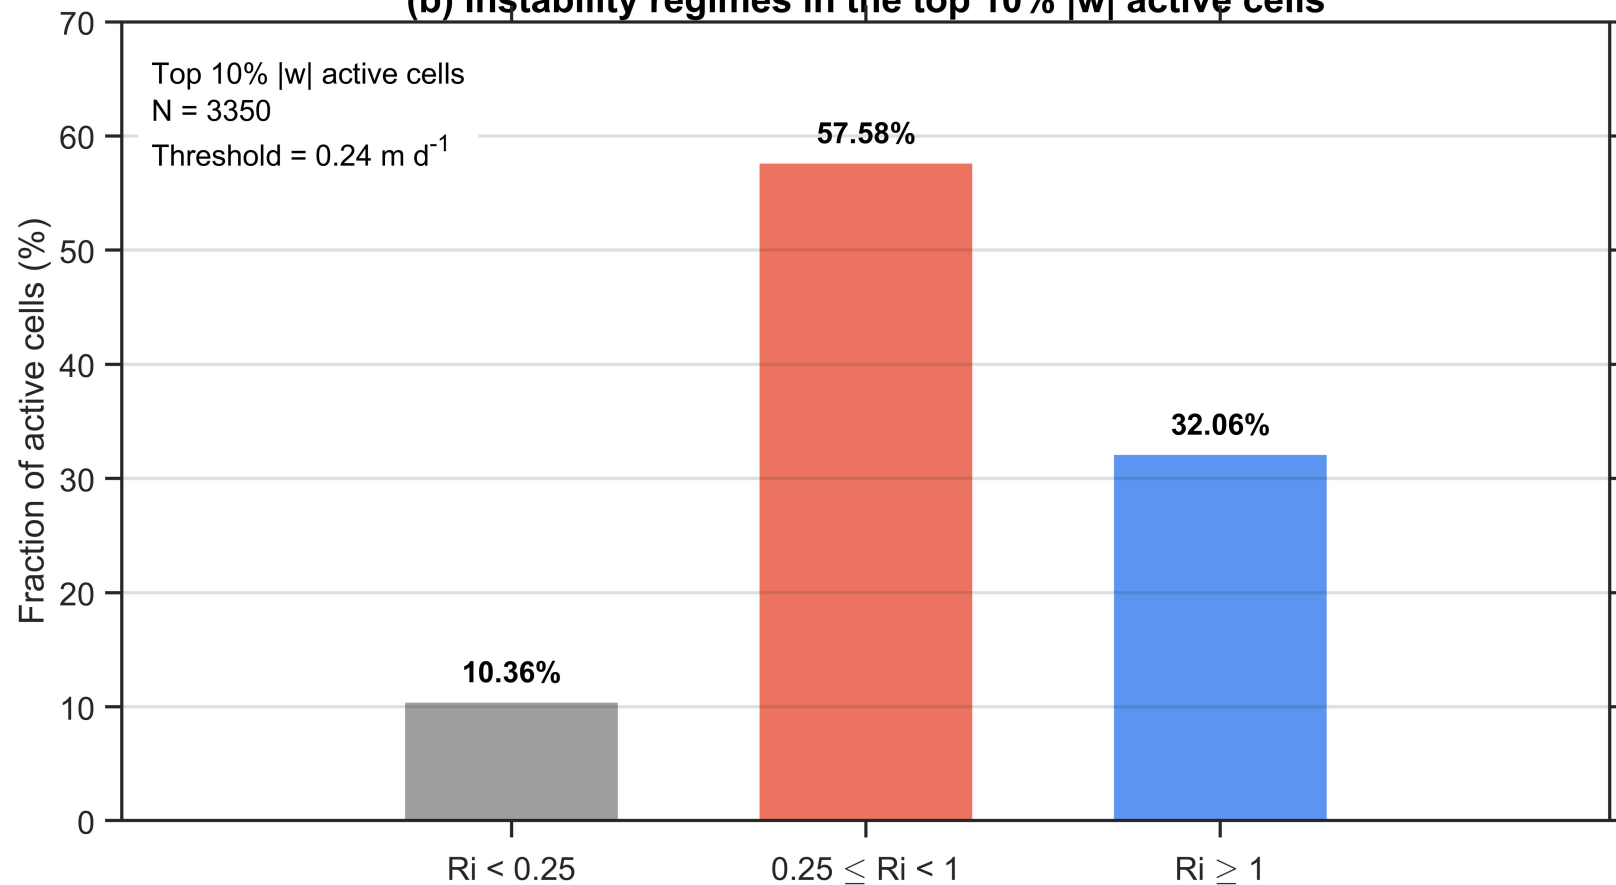

Supplement: Supplementary file 1 [file 274a11173483458e906e62a7.pdf]
