# Supplementary material
Source: Research Square preprint supplement (doi:10.21203/rs.3.rs-10206443/v1)

**(a) Seasonal MLD evolution and sea-level variability**

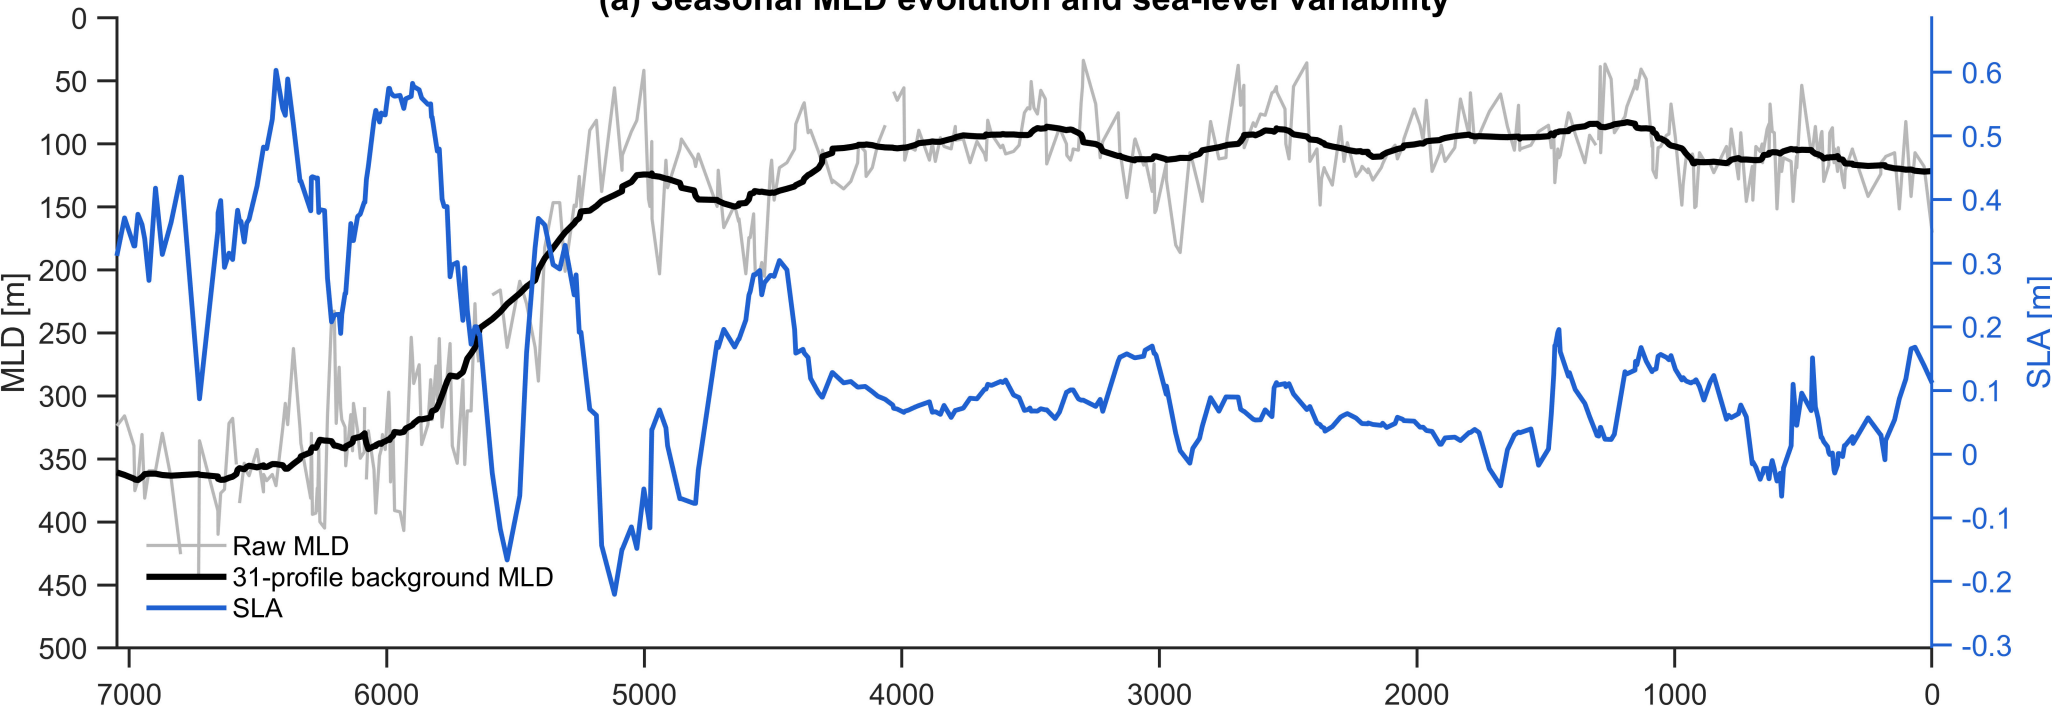

**(b) Mesoscale MLD and SLA anomalies**

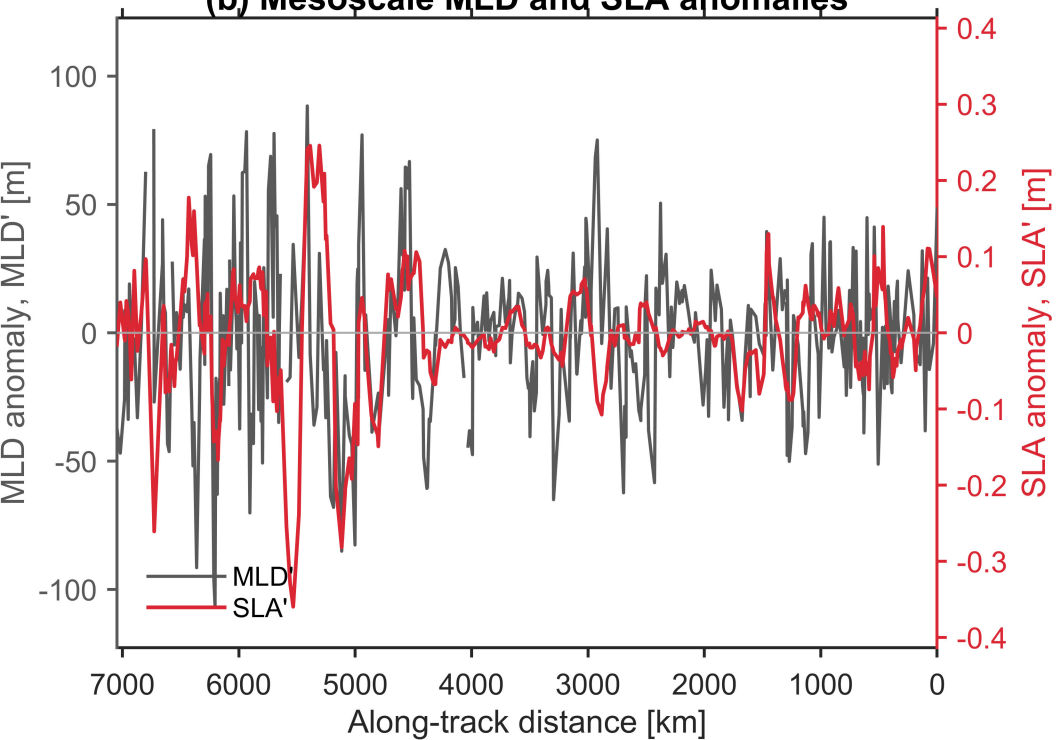

**(c) Mesoscale modulation of MLD**

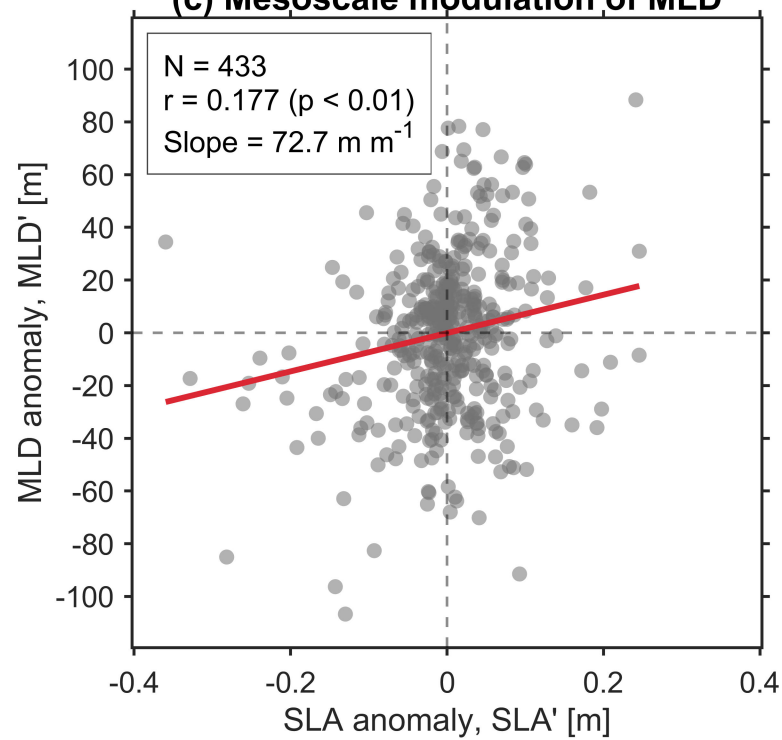

Supplement: Supplementary file 2 [file 5fcadbbc446e2f31355fe937.pdf]
